# Supplementary material for: Simply Prepared Magnesium Vanadium Oxides as Cathode Materials for Rechargeable Aqueous Magnesium Ion Batteries
Source: MDPI journal article supplement (doi:10.3390/nano12162767), 2022-08-12
Supplement: s1 [file s1]

# Supplementary data

## Simply Prepared Magnesium Vanadium Oxides as Cathode Materials for Rechargeable Aqueous Magnesium Ion Batteries

Milica M. Vasić <sup>1</sup>, Miloš Milović <sup>2</sup>, Danica Bajuk-Bogdanović <sup>1</sup>, Tamara Petrović <sup>1</sup> and Milica J. Vujković <sup>1,\*</sup>

<sup>1</sup> Faculty of Physical Chemistry, University of Belgrade, Studentski trg 12-16, 11000 Belgrade, Serbia

<sup>2</sup> Institute of Technical Sciences of SASA, Knez Mihajlova 35/IV, 11000 Belgrade, Serbia

\* Correspondence: milica.vujkovic@ffh.bg.ac.rs

Table S1. Assignment of the FTIR and Raman spectral bands of the MgVO precursor material.

| Band position                               | Assignment                                                                                 | reference |
|---------------------------------------------|--------------------------------------------------------------------------------------------|-----------|
| FTIR spectra                                |                                                                                            |           |
| 1417cm <sup>-1</sup>                        | NH <sub>4</sub> VO <sub>3</sub> - stretching v(NH <sub>4</sub> <sup>+</sup> )              | [62]      |
| 930 cm <sup>-1</sup>                        | NH <sub>4</sub> VO <sub>3</sub> - stretching symmetric v <sub>s</sub> (VO <sub>2</sub> )   | [62]      |
| 896 cm <sup>-1</sup>                        | NH <sub>4</sub> VO <sub>3</sub> - stretching asymmetric v <sub>as</sub> (VO <sub>2</sub> ) | [62]      |
| 850 cm <sup>-1</sup>                        | NH <sub>4</sub> VO <sub>3</sub>                                                            | [62]      |
| 685 cm <sup>-1</sup>                        | NH <sub>4</sub> VO <sub>3</sub> - stretching asymmetric v <sub>as</sub> (VOV)              | [62]      |
| 500 cm <sup>-1</sup>                        | NH <sub>4</sub> VO <sub>3</sub> - stretching symmetric v <sub>s</sub> (VOV)                | [62]      |
| Raman spectra                               |                                                                                            |           |
| 928cm <sup>-1</sup>                         | NH <sub>4</sub> VO <sub>3</sub> - stretching symmetric v <sub>s</sub> (VO <sub>2</sub> )   | [62]      |
| 897cm <sup>-1</sup>                         | NH <sub>4</sub> VO <sub>3</sub> - stretching asymmetric v <sub>as</sub> (VO <sub>2</sub> ) | [62]      |
| 646 cm <sup>-1</sup>                        | NH <sub>4</sub> VO <sub>3</sub> - stretching asymmetric v <sub>as</sub> (VOV)              | [62]      |
| 496 cm <sup>-1</sup>                        | NH <sub>4</sub> VO <sub>3</sub> - stretching symmetric v <sub>s</sub> (VOV)                | [62]      |
| 383 cm <sup>-1</sup> ; 350cm <sup>-1</sup>  | NH <sub>4</sub> VO <sub>3</sub>                                                            | [62]      |
| 322 cm <sup>-1</sup>                        | NH <sub>4</sub> VO <sub>3</sub> - bending δ(VO <sub>2</sub> )                              | [62]      |
| 259 cm <sup>-1</sup> ; 213 cm <sup>-1</sup> | NH <sub>4</sub> VO <sub>3</sub>                                                            | [62]      |

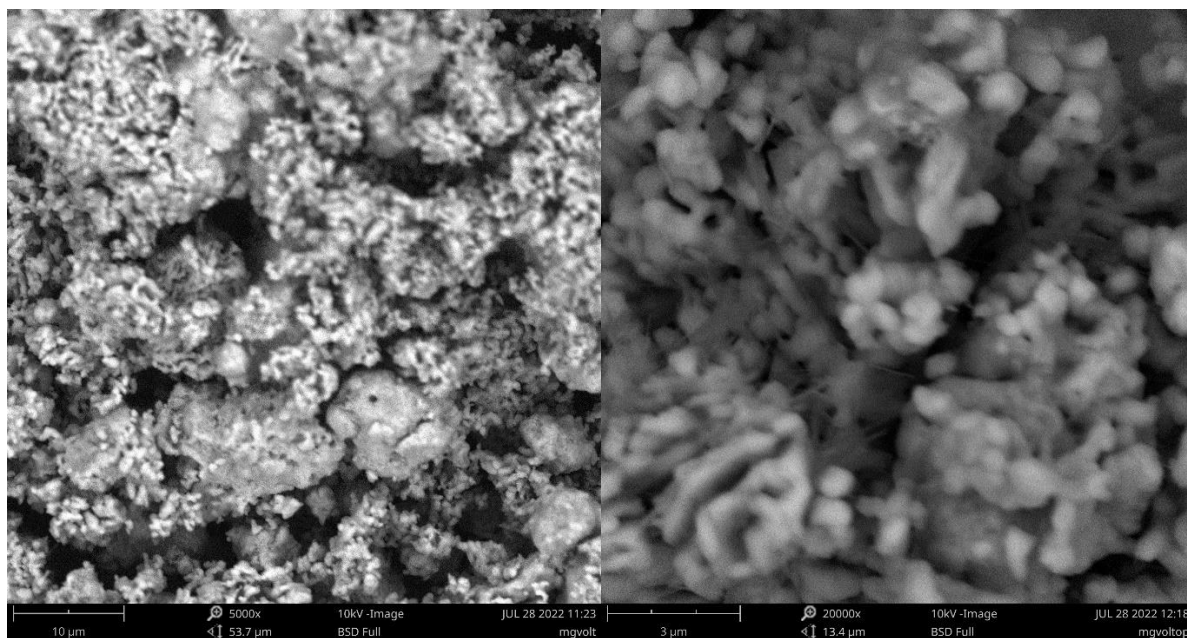

Figure S1. SEM micrographs of MgVO-LT at different positions and magnifications.

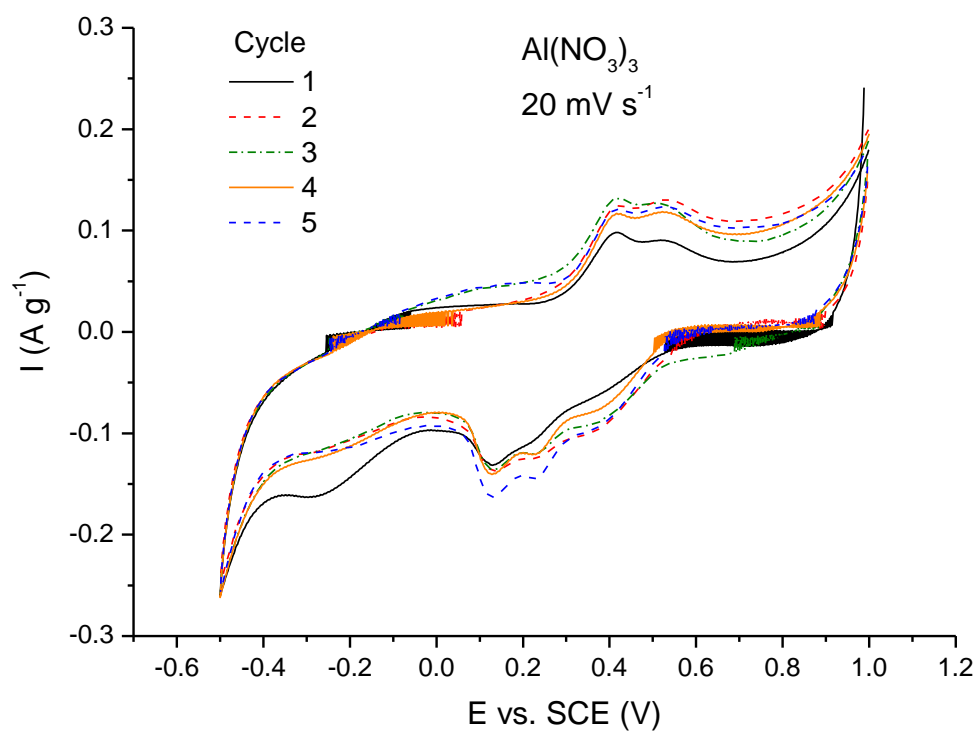

Figure S2. Cyclic voltammograms of MgVO-HT in 1M  $\text{Al}(\text{NO}_3)_3$ , at  $20 \text{ mV s}^{-1}$ .

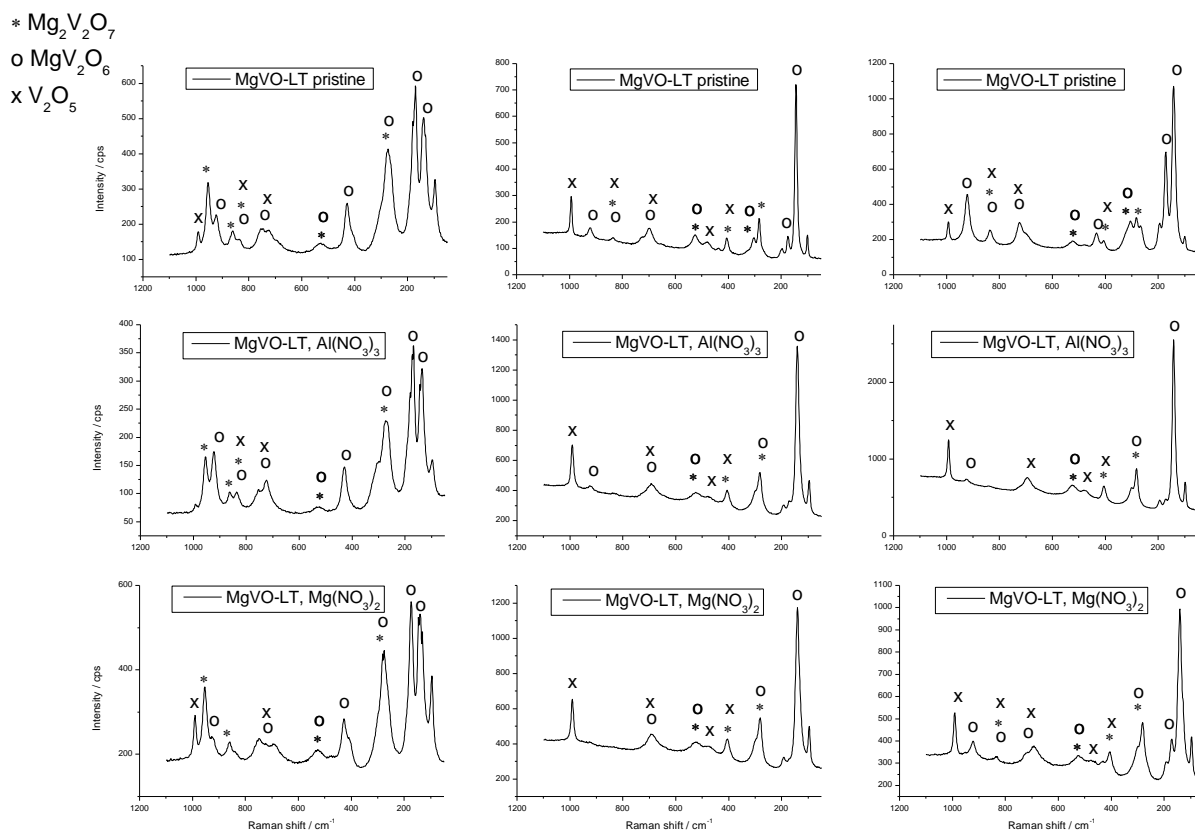

Figure S3. Raman spectra of the MgVO-LT electrode material acquired at different spots, before and after electrochemical treatments in  $\text{Mg}(\text{NO}_3)_2$  and  $\text{Al}(\text{NO}_3)_3$ .

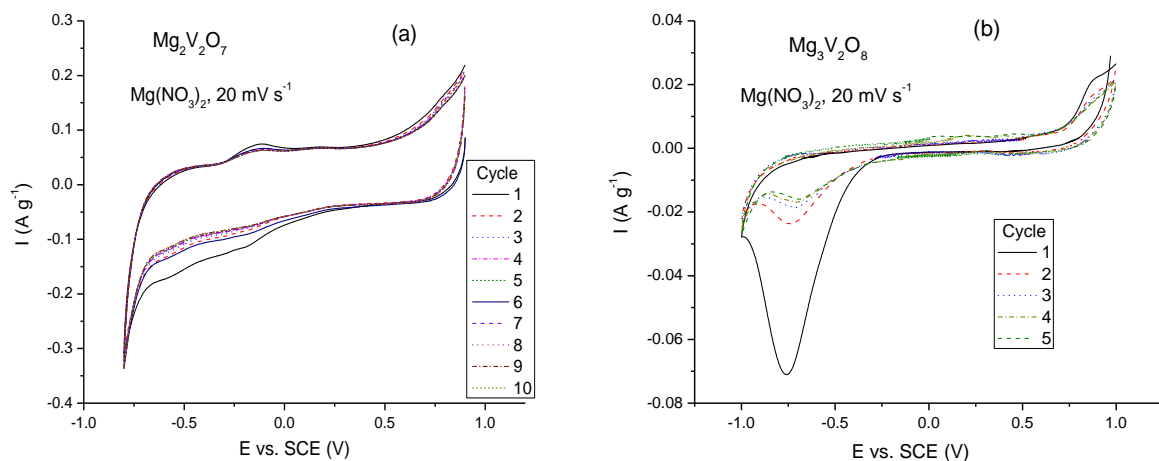

Figure S4. Cyclic voltammograms of  $\text{Mg}_2\text{V}_2\text{O}_7$  (a) and  $\text{Mg}_3\text{V}_2\text{O}_8$  (b) materials in 3 M  $\text{Mg}(\text{NO}_3)_2$ , at 20  $\text{mV s}^{-1}$ .

**Table S2.** Comparative electrochemical properties of VO-based oxides in Mg-containing aqueous solutions.

| Material                                                                                                                         | Electrolyte                              | Capacity<br>/ mAh g <sup>-1</sup> | Current<br>/ A g <sup>-1</sup> | Ref.      |
|----------------------------------------------------------------------------------------------------------------------------------|------------------------------------------|-----------------------------------|--------------------------------|-----------|
| MgV <sub>3</sub> O <sub>8</sub> /Mg <sub>3</sub> V <sub>2</sub> O <sub>8</sub> /MgV <sub>2</sub> O <sub>4</sub> cathode (MgVO/C) | 3 M<br>Mg(NO <sub>3</sub> ) <sub>2</sub> | 65                                | 0.2                            | This work |
|                                                                                                                                  |                                          | 48                                | 0.9                            |           |
|                                                                                                                                  |                                          | 30                                | 4.6                            |           |
| V <sub>2</sub> O <sub>5</sub> /MgV <sub>2</sub> O <sub>6</sub> /Mg <sub>2</sub> V <sub>2</sub> O <sub>7</sub> cathode (MgVO-LT)  | 3 M<br>Mg(NO <sub>3</sub> ) <sub>2</sub> | 35                                | 0.1                            | This work |
|                                                                                                                                  |                                          | 20                                | 0.5                            |           |
|                                                                                                                                  |                                          | 14                                | 5                              |           |
| V <sub>2</sub> O <sub>5</sub> cathode<br>AACVD* synt. at 500°C                                                                   | 0.075 M<br>MgCl <sub>2</sub>             | 427                               | 5.9                            | [77]      |
|                                                                                                                                  |                                          | 225                               | 3.9                            |           |
|                                                                                                                                  |                                          | 170                               | 2.4                            |           |
| V <sub>2</sub> O <sub>5</sub> ,<br>AACVD* synt. at 600°C<br>(cathode)                                                            | 0.075 M<br>MgCl <sub>2</sub>             | 300                               | 15                             | [78]      |
|                                                                                                                                  |                                          | 270                               | 4.9                            |           |
|                                                                                                                                  |                                          | 230                               | 3.9                            |           |
| V <sub>2</sub> O <sub>5</sub> xerogel/graphite cathode                                                                           | 3 M<br>Mg(NO <sub>3</sub> ) <sub>2</sub> | 100                               | 1                              | [40]      |
|                                                                                                                                  |                                          | 53                                | 3                              |           |
|                                                                                                                                  |                                          | 44                                | 5                              |           |
| NaV <sub>6</sub> O <sub>15</sub> /NaV <sub>6</sub> O <sub>16</sub>                                                               | 3 M<br>Mg(NO <sub>3</sub> ) <sub>2</sub> | 109                               | 20                             | [41]      |
|                                                                                                                                  |                                          |                                   | mVs <sup>-1</sup>              |           |
| FeVO <sub>4</sub> anode                                                                                                          | 1 M<br>MgSO <sub>4</sub>                 | 140                               | 0.05                           | [79]      |
|                                                                                                                                  |                                          | 100                               | 0.1                            |           |
|                                                                                                                                  |                                          | 51                                | 0.5                            |           |
| FeVO <sub>4</sub> /C anode                                                                                                       | 1 M<br>MgSO <sub>4</sub>                 | 184                               | 0.05                           | [79]      |
|                                                                                                                                  |                                          | 135                               | 0.1                            |           |
|                                                                                                                                  |                                          | 88 mAh g <sup>-1</sup>            | 0.5                            |           |

\*AACVD – aerosol assisted chemical vapor deposition
